# Supplementary material
Source: publisher figshare collection journal article supplement (https://karger.figshare.com/ndownloader/files/13151516)
Supplement: Supplementary file 1 [file 13151516]

| **Supplementary Table A.2**– Group differences in the the Δscore of the Quality of Life Questionnaire for Superficial Bladder Carcinoma (QLQ-BLS24) at 3 months (compared to the results at the time of inclusion) for the incomplete (n=7) and complete (n=7) transurethral resection group. | BLS-24 |  |  |
| --- | --- | --- | --- |
|  | **Complete TURBT**  **Δscore**  **mean (SD)** | **Incomplete TURBT**  **Δscore**  **mean (SD)** | ***p*-value*** |
| Urinary symptoms*  (missingn=1, incomplete TURBT) | 3.4 (6.6) | 11.9 (14.7) | 0.21 |
| Intravesical treatment problems** | -2.4 (20.3) | -4.8 (23.0) | 0.84 |
| Future perspective*** | 3.2 (36.7) | -3.2 (24.6) | 0.80 |
| Fever  (missingn=1, incomplete TURBT) | 0.0 (0.0) | 0.0 (0.0) | 1.00 |
| Feeling unwell  (missingn=1, incomplete TURBT) | -4.8 (12.6) | 5.6 (13.6) | 0.17 |
| Abdominal bloating  (missingn=1, incomplete TURBT) | 9.5 (25.2) | 11.1 (27.2) | 0.91 |
| Flatulence  (missingn=1, incomplete TURBT) | 1. (19.2) | 11.1 (27.2) | 0.50 |
| Libido  (missing n=2, incomplete TURBT n=1) | 11.1 (17.2) | 0.0 (0.0) | 0.14 |
| Sexual activity  (missing n=3, incomplete TURBT n=2) | 5.6 (13.6) | -6.8 (14.9) | 0.18 |
| Erectile dysfunction  (missing n=8, incomplete TURBT n=5) | 0.0 (0.0) | -33.3 (47.1) | 0.16 |
| Ejaculation dysfunction  (missing n=8, incomplete TURBT n=5) | 0.0 (0.0) | 0.0 (0.0) | 0.16 |
| Sexual function  *Crohnbach’s α was 0.788/0.846 for urinary symptoms at baseline and 3 months respectively.  ** Crohnbach’s α was 0.788/0.875 for intravesitcal treatment problems at baseline and 3 months respectively.  *** Crohnbach’s α was 0.555/0.831 for future perspective at baseline and 3 months respectively.  (missing n=10, incomplete TURBT n=7)  -uncomfortable with thought of sexual contact  -afraid of harming partner  -enjoyed sex  -nonlubricating vagina  (missing n=12, incomplete TURBT n=6) | 1. (0.0) 2. (0.0)   0.0 (0.0)  8.3 (16.7)  0.0 | No data  No data  No data  0.0 | -  -  -  -  1.00 |

SD=standard deviation; TURBT=transurethral resection of the bladder tumour
